# Supplementary material for: Verification of Key Target Molecules for Intramuscular Fat Deposition and Screening of SNP Sites in Sheep from Small-Tail Han Sheep Breed and Its Cross with Suffolk
Source: MDPI journal article supplement (doi:10.3390/ijms25052951), 2024-03-03

Supplementary Table S1: Primer Sequence

| Gene name     | Accession NO.  | Sequence 5'-3'          | Product Length |
|---------------|----------------|-------------------------|----------------|
| <i>PIK3R1</i> | XM_004016920.4 | F: CCCACCATGACGAGAAGACT | 116 bp         |
|               |                | R: GCCCTGTTTACTGCTTTCCC |                |
| <i>PPARA</i>  | XM_027968213.2 | F: ATCGAGTGTAGGATCTGCGG | 121 bp         |
|               |                | R: CGCATCTGTCATACACCAGC |                |
| <i>GAPDH</i>  | NM_001190390.1 | F: CCATCTTCCAGGAGCGAGAT | 137 bp         |
|               |                | R: TGGTCATAAGTCCCTCCACG |                |

Supplementary Table S2: Statistical analysis of IMF content

| Sample  | %Area  | Mean    | IntDen   |
|---------|--------|---------|----------|
| STH     | 2.462  | 62.819  | 48014.94 |
| STH     | 2.731  | 85.183  | 31832.84 |
| STH     | 2.731  | 85.183  | 31832.84 |
| STH     | 1.848  | 64.447  | 26144.59 |
| STH     | 1.798  | 61.889  | 25955.27 |
| STH     | 1.794  | 61.752  | 25867.58 |
| SFK×STH | 23.272 | 103.331 | 194767.3 |
| SFK×STH | 23.342 | 105.449 | 179256.5 |
| SFK×STH | 23.161 | 100.452 | 205817.5 |
| SFK×STH | 16.24  | 108.651 | 91621.73 |
| SFK×STH | 15.76  | 94.508  | 154686   |
| SFK×STH | 15.402 | 88.245  | 164132.4 |

Supplementary Figure S1: DNA Electrophoresis Detection Results of Sheep Blood Group

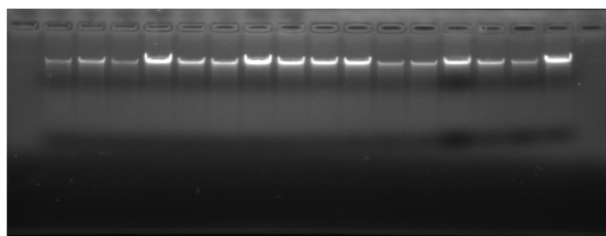Supplementary Figure S2: PCR amplification products of *PIK3R1* gene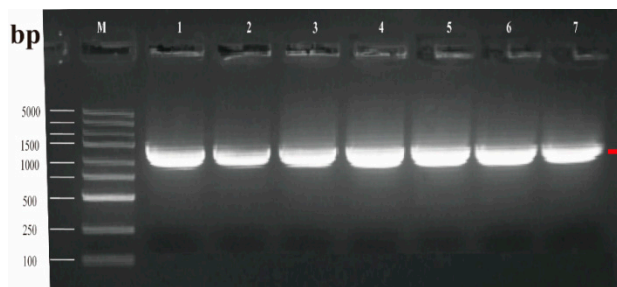

Supplementary Figure S3: Sanger sequencing peak of exon 7 DNA amplification fragment product  
of sheep PIK3R1 gene

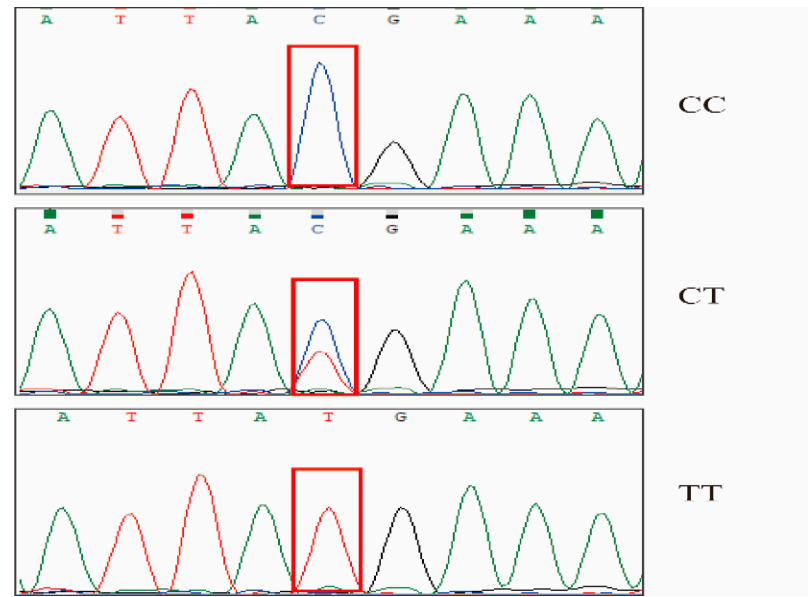

Supplement: s1 [file s1]
